# Supplementary material
Source: Springer Nature journal article supplement (https://www.springermedizin.de/resource/supplementary/12889_2008_1450_MOESM4_ESM.pdf/9504254)

Non-Communicable, 52.1%

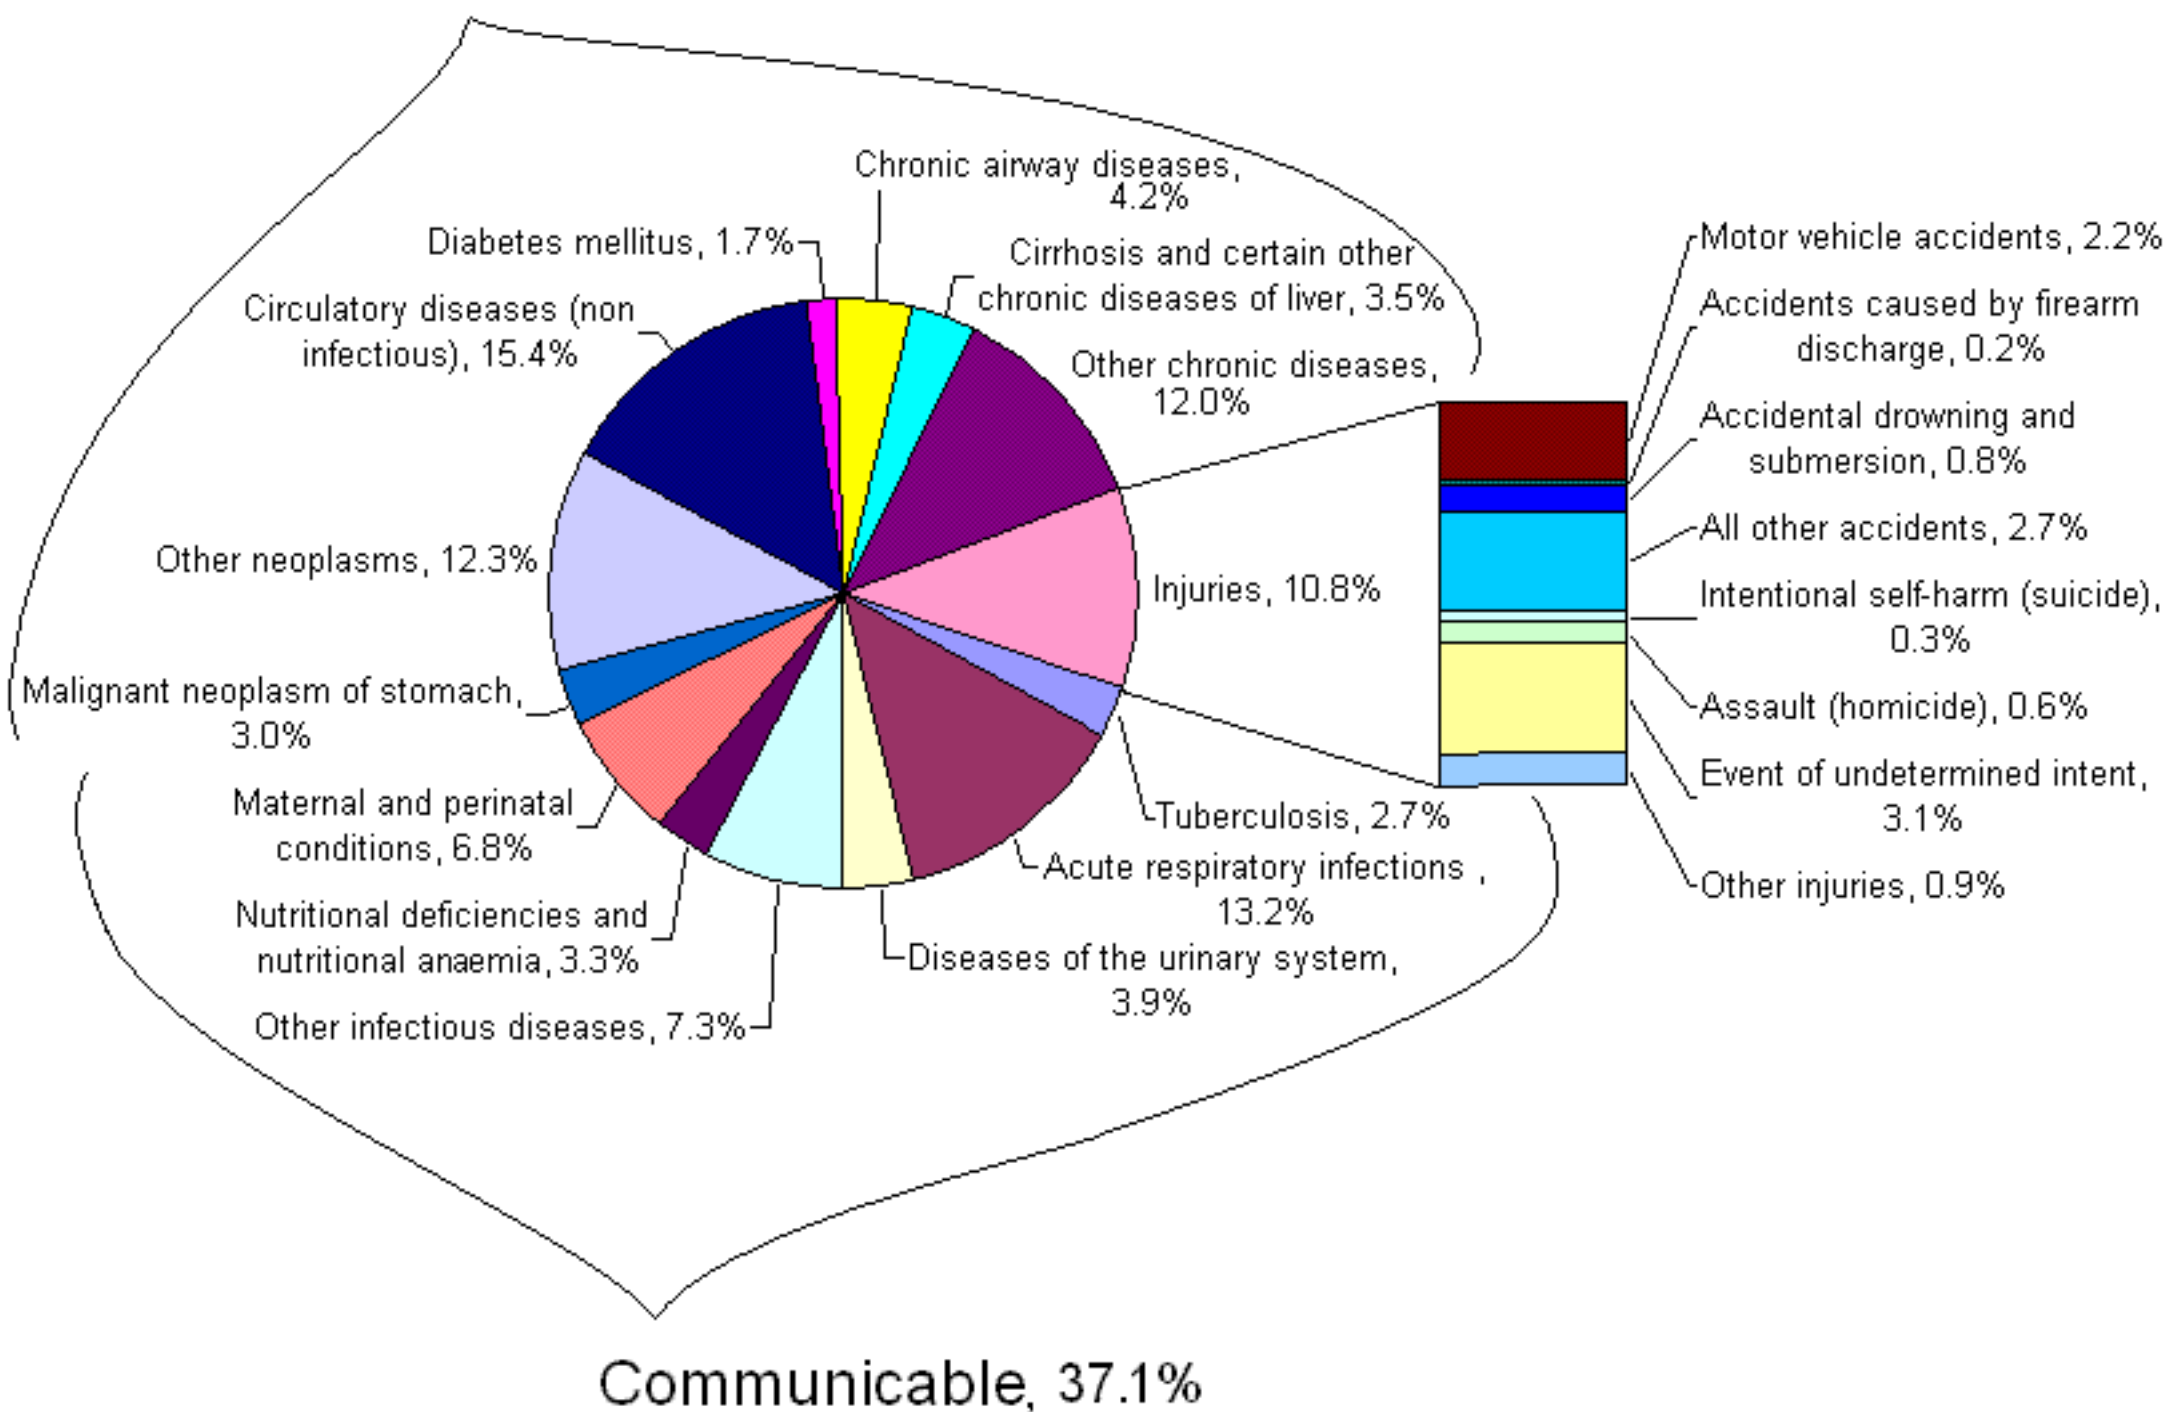

Supplement: MOESM4 [file 9504254]
